# Supplementary material
Source: MDPI journal article supplement (https://www.mdpi.com/2071-1050/13/24/14030)
Supplement: s1 [file s1 › sustainability-1489734-supplementary.pdf]

# Pilot Cultivation of the Vulnerable Cretan Endemic *Verbascum arcturus* L. (Scrophulariaceae): Effect of Fertilization on Growth and Quality Features

**Supplementary Table S1.** Experimental field soil properties of the research garden of the Hellenic Mediterranean University used for the fertilization trials on *Verbascum arcturus*. CEC: cation exchange capacity; EC<sub>se</sub>: saturation extract electrical conductivity; SAR: sodium absorption ratio. Values represent the mean of three replicates ± SE.

| Soil texture                              |                                           |                    | pH                     | CaCO <sub>3</sub>     | EC <sub>se</sub>      | SAR         | Organic C             | Total N    |
|-------------------------------------------|-------------------------------------------|--------------------|------------------------|-----------------------|-----------------------|-------------|-----------------------|------------|
| Sand                                      | Silt                                      | Clay               |                        |                       |                       |             |                       |            |
|                                           | (g kg <sup>-1</sup> )                     |                    | (1:2 H <sub>2</sub> O) | (g kg <sup>-1</sup> ) | (dS m <sup>-1</sup> ) |             | (g kg <sup>-1</sup> ) |            |
| 651 ± 7                                   | 195 ± 7                                   | 154 ± 0            | 8.1 ± 0.0              | 369 ± 4               | 0.63 ± 0.06           | 0.52 ± 0.03 | 19.3 ± 2.1            | 17.6 ± 0.2 |
| CEC                                       | Available concentration of macronutrients |                    |                        |                       |                       |             |                       |            |
|                                           | NO <sub>3</sub> -N                        | NH <sub>4</sub> -N | P                      | K                     | Ca                    | Mg          |                       |            |
| (cmol <sub>c</sub> kg <sup>-1</sup> )     | (mg kg <sup>-1</sup> )                    |                    |                        |                       |                       |             |                       |            |
| 16.9 ± 0.4                                | 68.8 ± 15.0                               | 10.8 ± 0.6         | 15.4 ± 3.4             | 260 ± 17              | 3145 ± 62             | 163 ± 20    |                       |            |
| Available concentration of micronutrients |                                           |                    |                        |                       |                       |             |                       |            |
| B                                         | Cu                                        | Zn                 | Fe                     | Mn                    |                       |             |                       |            |
| (mg kg <sup>-1</sup> )                    |                                           |                    |                        |                       |                       |             |                       |            |
| 0.61 ± 0.08                               | 8.0 ± 0.1                                 | 0.89 ± 0.02        | 5.2 ± 0.4              | 3.6 ± 0.5             |                       |             |                       |            |

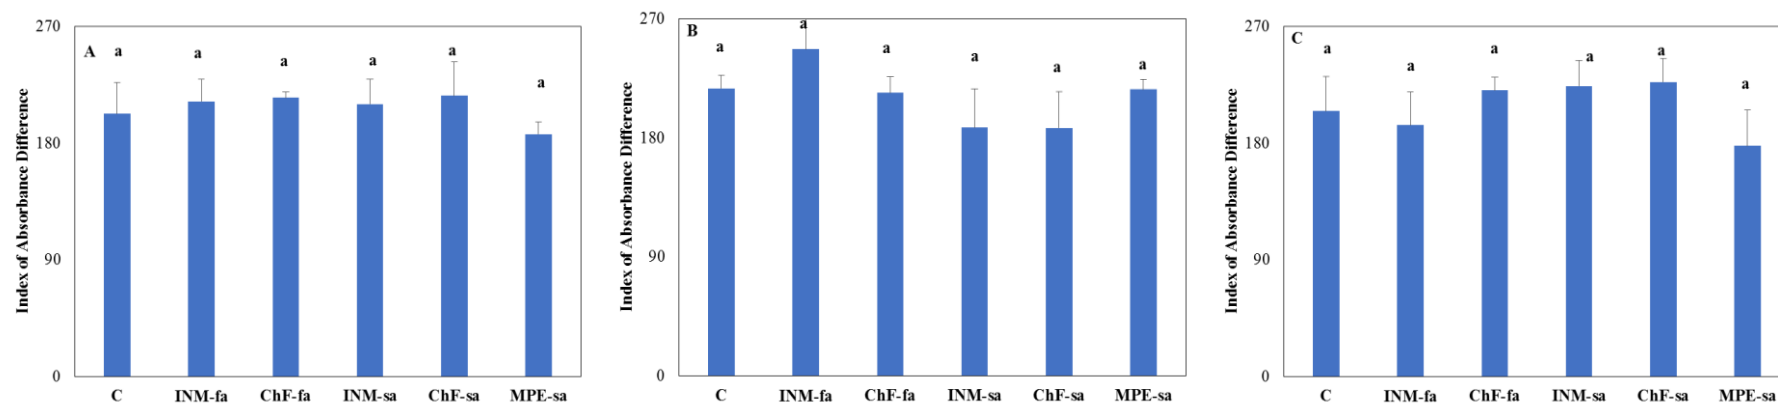

**Supplementary Figure S1.** Effect of fertilization through different (root/ foliar) application methods on the leaf index of absorbance difference of *Verbascum arcturus* at (A) vegetative; (B) early flowering; (C) full flowering stages. C: control (only water); INM-fa: integrated nutrient management fertilization by foliar application; ChF-fa: conventional fertilization by foliar application; INM-sa: integrated nutrient management fertilization by soil application; ChF-sa: conventional fertilization by soil application; MPE-sa: mixture of plant extracts as biostimulant by soil application. Values represent the mean of three replicates  $\pm$  SEM. Different letters within each plot, indicate significant differences.

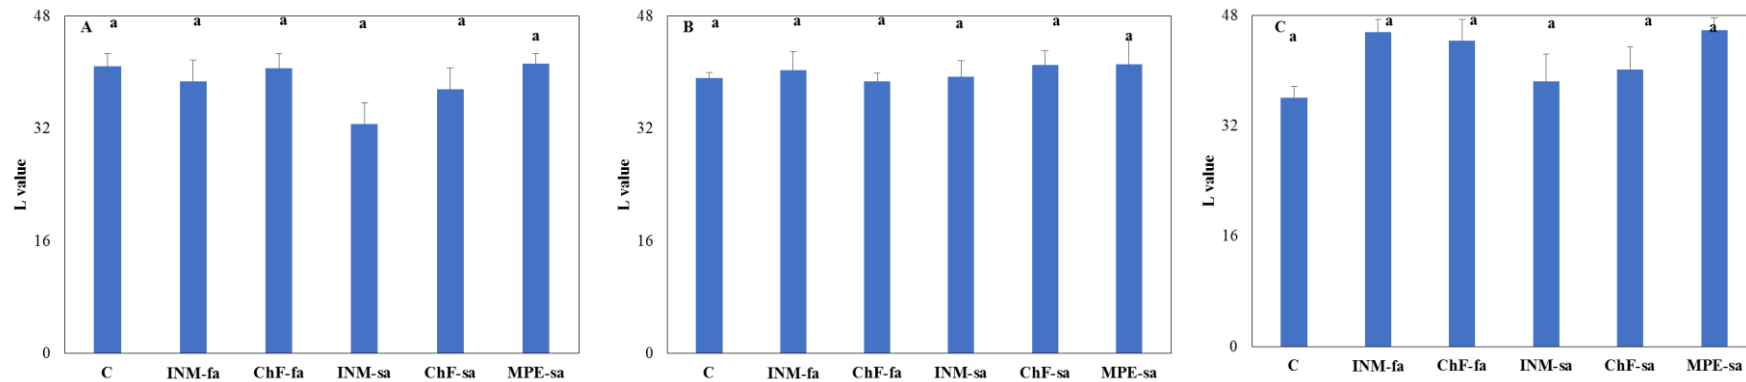

**Supplementary Figure S2.** Effect of fertilization through different (root/ foliar) application methods on the leaf L value of *Verbascum arcturus* at (A) vegetative; (B) early flowering; (C) full flowering stages. C: control (only water); INM-fa: Integrated nutrient management fertilization by foliar application; ChF-fa: conventional fertilization by foliar application; INM-sa: integrated nutrient management fertilization by soil application; ChF-sa: conventional fertilization by soil application; MPE-sa: mixture of plant extracts as biostimulant by soil application. Values represent the mean of three replicates  $\pm$  SEM. Different letters within each plot, indicate significant differences.

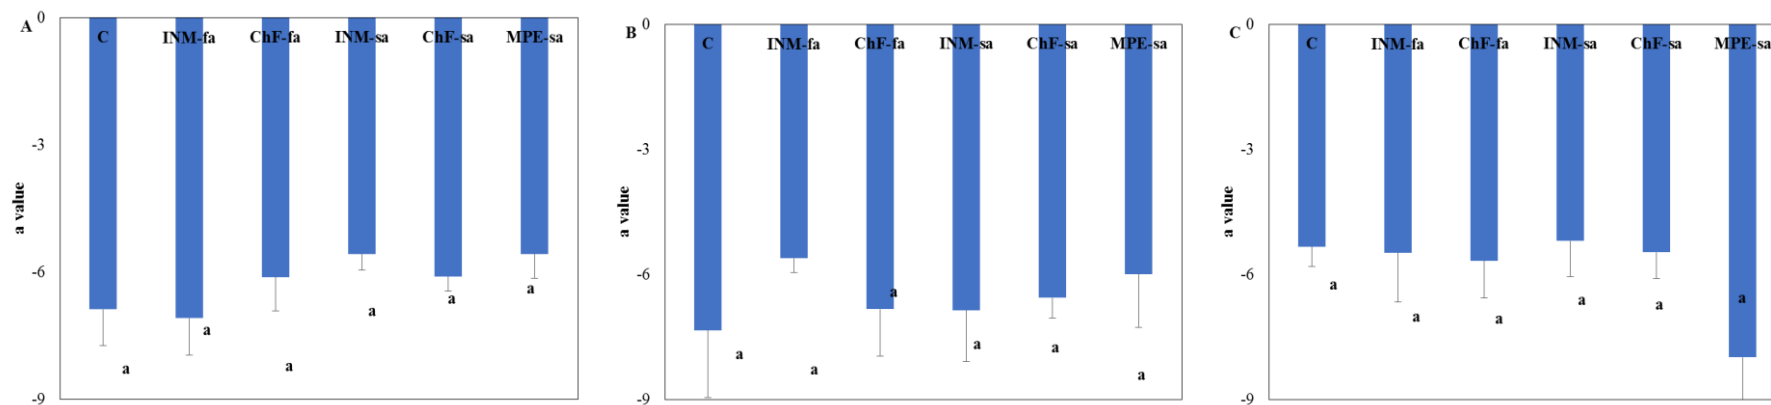

**Supplementary Figure S3.** Effect of fertilization through different (root/ foliar) application methods on the leaf a value of *Verbascum arcturus* at (A) vegetative; (B) early flowering; (C) full flowering stages. C: control (only water); INM-fa: integrated nutrient management fertilization by foliar application; ChF-fa: conventional fertilization by foliar application; INM-sa: integrated nutrient management fertilization by soil application; ChF-sa: conventional fertilization by soil application; MPE-sa: mixture of plant extracts as biostimulant by soil application. Values represent the mean of three replicates  $\pm$  SEM. Different letters within each plot, indicate significant differences.

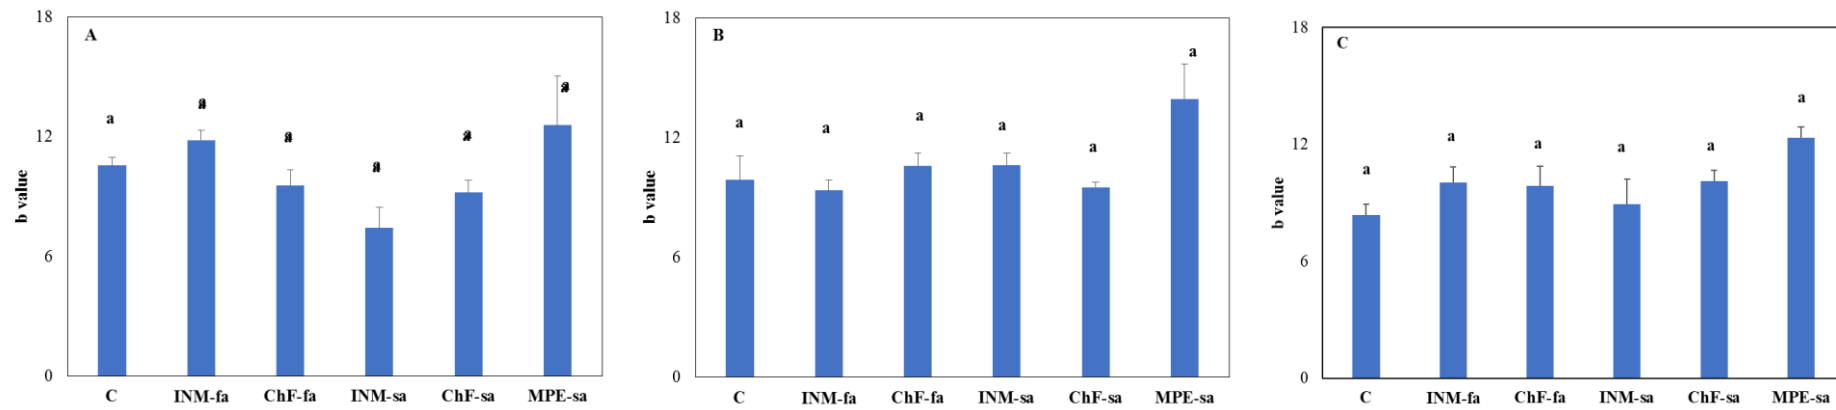

**Supplementary Figure S4.** Effect of fertilization through different (root/ foliar) application methods on the leaf b value of *Verbascum arcturus* at (A) vegetative; (B) early flowering; (C) full flowering stages. C: Control (only water); INM-fa: Integrated nutrient management fertilization by foliar application; ChF-fa: Conventional fertilization by foliar application; INM-sa: Integrated nutrient management fertilization by soil application; ChF-sa: Conventional fertilization by soil application; MPE-sa: Mixture of plant extracts as biostimulant by soil application. Values represent the mean of three replicates  $\pm$  SEM. Different letters within each plot indicate significant differences.

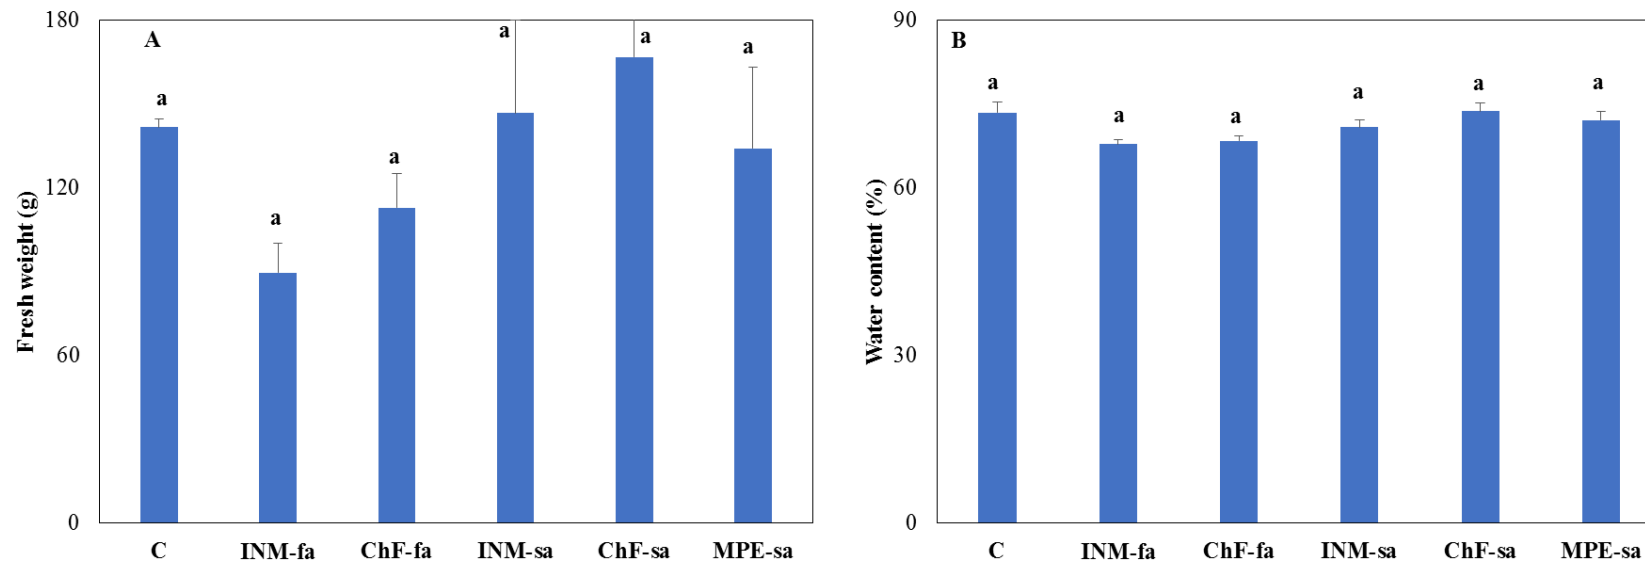

**Supplementary Figure S5.** Effect of fertilization through different (root/ foliar) application methods on **(A)** above-ground fresh mass; **(B)** water content of *Verbascum arcturus*. C: control (only water); INM-fa: integrated nutrient management fertilization by foliar application; ChF-fa: conventional fertilization by foliar application; INM-sa: integrated nutrient management fertilization by soil application; ChF-sa: conventional fertilization by soil application; MPE-sa: mixture of plant extracts as biostimulant by soil application. Values represent the mean of six replicates  $\pm$  SEM. Different letters within each plot, indicate significant differences.
